# Supplementary material
Source: Research Square preprint supplement (doi:10.21203/rs.3.rs-9915497/v1)
Supplement: Supplementary file 1 [file d8fd2fa8771e20e165f087bf.docx]

# The STARD 2015 list

Standards for Reporting of Diagnostic Accuracy Studies — checklist of 30 essential items.

| **Section and topic** | **No** | **Item** | **Line** |
| --- | --- | --- | --- |
| **Title or abstract** | | |  |
|  | 1 | Identification as a study of diagnostic accuracy using at least one measure of accuracy (such as sensitivity, specificity, predictive values or AUC) | 2 |
| **Abstract** | | |  |
|  | 2 | Structured summary of study design, methods, results and conclusions (for specific guidance, see STARD for Abstracts) | 14-34 |
| **Introduction** | | |  |
|  | 3 | Scientific and clinical background, including the intended use and clinical role of the index test | 37-55 |
|  | 4 | Study objectives and hypotheses | 61-63 |
| **Methods** | | |  |
| Study design | 5 | Whether data collection was planned before the index test and reference standard were performed (prospective study) or after (retrospective study) | 66 |
| Participants | 6 | Eligibility criteria | 70-80 |
| 7 | On what basis potentially eligible participants were identified (such as symptoms, results from previous tests, inclusion in registry) | 70-80 |
| 8 | Where and when potentially eligible participants were identified (setting, location and dates) | 67-70 |
| 9 | Whether participants formed a consecutive, random or convenience series | 67-70 |
| Test methods | 10a | Index test, in sufficient detail to allow replication | 101-114 |
| 10b | Reference standard, in sufficient detail to allow replication | 101-114 |
| 11 | Rationale for choosing the reference standard (if alternatives exist) | 101-114 |
| 12a | Definition of and rationale for test positivity cut-offs or result categories of the index test, distinguishing prespecified from exploratory | 126-138 |
| 12b | Definition of and rationale for test positivity cut-offs or result categories of the reference standard, distinguishing prespecified from exploratory | 126-138 |
| 13a | Whether clinical information and reference standard results were available to the performers or readers of the index test | 114 |
| 13b | Whether clinical information and index test results were available to the assessors of the reference standard | 114 |
| Analysis | 14 | Methods for estimating or comparing measures of diagnostic accuracy | 122-144 |
| 15 | How indeterminate index test or reference standard results were handled | 122-144 |
| 16 | How missing data on the index test and reference standard were handled | NA (no missing data) |
| 17 | Any analyses of variability in diagnostic accuracy, distinguishing prespecified from exploratory | 122-144 |
| 18 | Intended sample size and how it was determined | 82-91 |
| **Results** | | |  |
| Participants | 19 | Flow of participants, using a diagram | 146-147 |
| 20 | Baseline demographic and clinical characteristics of participants | 146-149 |
| 21a | Distribution of severity of disease in those with the target condition | 149-153 |
| 21b | Distribution of alternative diagnoses in those without the target condition | 152-153 |
| 22 | Time interval and any clinical interventions between index test and reference standard | NA  (Cross-section) |
| Test results | 23 | Cross tabulation of the index test results (or their distribution) by the results of the reference standard | Table 2 |
| 24 | Estimates of diagnostic accuracy and their precision (such as 95% CIs) | Table 2 |
| 25 | Any adverse events from performing the index test or the reference standard | NA (anthropometric measurement) |
| **Discussion** | | |  |
|  | 26 | Study limitations, including sources of potential bias, statistical uncertainty and generalisability | 231-246 |
|  | 27 | Implications for practice, including the intended use and clinical role of the index test | 255-260 |
| **Other information** | | |  |
|  | 28 | Registration number and name of registry | 269-271 |
|  | 29 | Where the full study protocol can be accessed | NA |
|  | 30 | Sources of funding and other support; role of funders | 272-275 |

*Source: Cohen JF, Korevaar DA, Altman DG, et al. STARD 2015 guidelines for reporting diagnostic accuracy studies: explanation and elaboration. BMJ Open 2016;6:e012799. doi:10.1136/bmjopen-2016-012799 (Table 2). Reproduced under the CC BY-NC 4.0 licence.*
